# Supplementary material
Source: Springer Nature journal article supplement (https://www.springermedizin.de/resource/supplementary/12875_2011_737_MOESM1_ESM.pdf/9435204)
Supplement: MOESM1 [file 9435204]

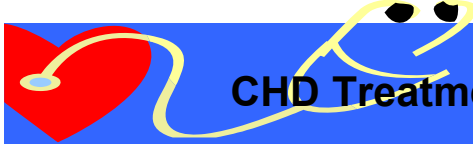

|                              |                                                                         |                                                                                                 |                                                                                                                                                         |
|------------------------------|-------------------------------------------------------------------------|-------------------------------------------------------------------------------------------------|---------------------------------------------------------------------------------------------------------------------------------------------------------|
| <b>Improvement Prognosis</b> | <b>Basic Medication</b>                                                 |                                                                                                 |                                                                                                                                                         |
|                              | ASA <sup>C</sup>                                                        | 100 mg/d                                                                                        | Long-lasting                                                                                                                                            |
|                              | Simvastatin / Pravastatin                                               | 40 mg/d                                                                                         | Long-lasting                                                                                                                                            |
|                              | <b>+ status after acute coronary syndrome with/without intervention</b> |                                                                                                 |                                                                                                                                                         |
|                              | Clopidogrel <sup>1</sup>                                                | 75 mg/d                                                                                         | (Dual inhibition!) 9 months, after intervention with DES 1 year, in case of ASA incompatibility long-lasting                                            |
|                              | Bisoprolol <i>or</i> Metoprololsucc.                                    | 2.5 - 10 mg/d<br>23.75 - 190                                                                    | After myocardial infarction long-lasting, also try in cases of COPD (only relative contraindication)                                                    |
|                              | Ramipril <sup>2</sup>                                                   | 2.5 - 10 mg/d                                                                                   | In cases of heart failure, possible in cases of hypertonia                                                                                              |
|                              | <b>+ after elective stent</b>                                           |                                                                                                 |                                                                                                                                                         |
|                              | Clopidogrel <sup>1</sup>                                                | 75 mg/d                                                                                         | Dual inhibition for one month (BMS), one year (DES); If necessary duration of administration modified by interventionalist (e.g. anatomical conditions) |
|                              | <b>+ heart failure</b>                                                  |                                                                                                 |                                                                                                                                                         |
| Ramipril <sup>2</sup>        | 2.5 - 10 mg/d                                                           | Target dose 10 mg/d, in cases of incompatibility Candesartan (target dose 32 mg/d) <sup>3</sup> |                                                                                                                                                         |
| Bisoprolol <sup>3</sup>      | 2.5 -10 mg/d                                                            | Begin with 1.25 mg/d, gradually increase, target dose 10 mg/d                                   |                                                                                                                                                         |
| Spironolacton                | 25 mg/d                                                                 | If symptomatic under ACE inhibitor + beta blocker treatment (50 mg tablet bisect)               |                                                                                                                                                         |

<sup>1</sup> : current status of authorization: day 1 – 28 Iscover® or Plavix®, then Clopidoprel generic

<sup>2</sup> : Sartane only in case of ACE - inhibitors - incompatibility AND urgent ACE - inhibitor - indication (heart failure)

<sup>3</sup> : *or* Nebivolol: in elderly + heart failure, 1.25mg to target dose 10 mg

<sup>4</sup> : in case of symptomatic effective medication question indication quarterly, stop if necessary

**Yearly influenza vaccination recommended.**

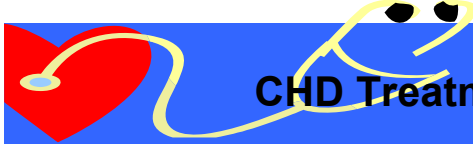

|                                    |                                            |                                             |                                                         |
|------------------------------------|--------------------------------------------|---------------------------------------------|---------------------------------------------------------|
| <b>Improvement Quality of life</b> | <b>anti-anginal treatment<sup>4</sup>:</b> |                                             |                                                         |
|                                    | ISDN                                       | 10/20/40 mg<br>40/80/120 mg ret<br>per dose | Only in the mornings, if necessary also at noon-time    |
|                                    | Molsidomin                                 | 1/2/4 mg<br>8 mg retard<br>per dose         | If therapy is necessary in the evenings and/or at night |
|                                    | Bisoprolol <i>or</i><br>Metoprololsucc.    | 2.5 -10 mg/d<br>23.75 -190 mg               | Simultaneous improvement of the prognosis               |
|                                    | <b>heart failure:</b>                      |                                             |                                                         |
|                                    | Furosemid                                  | 20-80 mg/d<br>(if so higher)                | Short duration of drug effect                           |
|                                    | Torasemid                                  | 5-10 mg/d                                   | Longer duration of drug effect                          |
|                                    | Xipamid                                    | 10-40 mg/d                                  | (Thiazid) alone or in combination                       |

### Abbreviations:

- PCI: percutaneous, coronary intervention  
(= **PTCA**: percutaneous, transluminal, coronary angioplasty)
- BMS : bare metal stent, uncoated stent
- DES : drug eluting stent, (drug -)coated stent
- UCG: ultrasound cardiograph, heart echo
- LVEF: left ventricular ejection fraction, cardiac output
- SE: side effects
- BP: blood pressure

**Regular care stable CHD**

|                | GP                                                                                                                                                                                                                                 | Cardiologist |
|----------------|------------------------------------------------------------------------------------------------------------------------------------------------------------------------------------------------------------------------------------|--------------|
| every 6 months | BP control, physical examination, weight, medication check<br>Quality of life? / Behaviour?<br>Labour not obligatory, except K, crea under ACE inhibitor/AT-1 inhibitor/ potassium-sparing diuretics<br>Muscle pain under statins? |              |

Physical examination: Heart auscultation, lung, leg oedemas

Quality of life: Coping with everyday life, sexuality, joy of life, social contacts, fears

Depression:

1. Did you feel down, depressed or hopeless in the last month?
2. During the last month, did you have less interest or joy in things that you used to like?

Behaviour: Smoking, intensity/lack of motions, over-/malnourishment  
Did you take your drugs as recommended?

**Elective PCI (PTCA) +/- Intervention (mostly) without Rehab**

|                               | GP                                                                                                                                                                                                                           | Cardiologist                                                                            |
|-------------------------------|------------------------------------------------------------------------------------------------------------------------------------------------------------------------------------------------------------------------------|-----------------------------------------------------------------------------------------|
| after intervention            | Check medication, enroll in a DMP<br>Quality of life? / Behaviour?<br>If necessary cardiac rehab groups<br>Incapacity for work: 3 – 5 days (medically sufficient)                                                            |                                                                                         |
| 4 weeks                       |                                                                                                                                                                                                                              | Exercise ECG (in-stent-stenosis?)                                                       |
| 3 months                      | BP control, physical examination, weight, medication check / SE?<br>Quality of life? / Behaviour?<br>Labour: total chol, LDL; statins new: CK, GPT; under ACE inhibitor/AT-1 inhibitor/ potassium-sparing diuretics: K, crea |                                                                                         |
| 6 months                      | Findings documentation to the cardiologist                                                                                                                                                                                   | Exercise ECG (if pathologic before PCI)<br>UCG (optional)                               |
| 12 months +<br>every 6 months | BP control, physical examination, weight, medication check<br>Quality of life? / Behaviour?<br>Labour not obligatory, except K, crea under ACE inhibitor/AT-1 inhibitor/ potassium-sparing diuretics                         | In special cases control exercise ECG after 12 months, Announcement by the cardiologist |
| 3 years                       |                                                                                                                                                                                                                              | Exercise ECG , UCG (optional)                                                           |

**After Acute Coronary Syndrome (ACS) / Bypass + (generally) Rehab**

|                            | GP                                                                                                                                                                                                         | Cardiologist                           |
|----------------------------|------------------------------------------------------------------------------------------------------------------------------------------------------------------------------------------------------------|----------------------------------------|
| after discharge            | Medication check, muscle pain?<br>enroll in a DMP<br>Quality of life? / Behaviour?                                                                                                                         |                                        |
| 3 months                   |                                                                                                                                                                                                            | Medication check<br>Exercise ECG , UCG |
| 6 months                   | BP control, physical examination, weight,<br>medication check / SE?<br>Quality of life? / Behaviour?<br>Labour: total chol / LDL; under ACE inhibitor/AT-1 inhibitor/ potassium-sparing diuretics: K, crea |                                        |
| 12 months                  |                                                                                                                                                                                                            | Exercise ECG , UCG (optional)          |
| 1 year +<br>every 6 months | BP control, physical examination, weight,<br>medication check<br>Quality of life? / Behaviour?<br>Labour not obligatory                                                                                    |                                        |
| 3 years                    |                                                                                                                                                                                                            | Exercise ECG , UCG (optional)          |

**Additional contact in case of disorders, unclear situation etc. every time!**

**CHD and heart failure**

|                                           | GP                                                                                                                                                                                                                                 | Cardiologist                 |
|-------------------------------------------|------------------------------------------------------------------------------------------------------------------------------------------------------------------------------------------------------------------------------------|------------------------------|
| <b>LVEF ≥ 50</b>                          | GP care like stable CHD                                                                                                                                                                                                            |                              |
| <b>LVEF 35 - 50</b><br>every 6 – 12 weeks | BP control, physical examination, weight,<br>medication: intake / SE?<br>check weight protocol<br>Quality of life? / Behaviour?<br>Labour not obligatory; under ACE inhibitor/AT-1 inhibitor/ potassium-sparing diuretics: K, crea |                              |
| every 12 months                           | <b>Info Cardiologist:</b> patient, weight, labour,<br>BP / pulse, medication,                                                                                                                                                      | ECG, possibly 24h – ECG, UCG |
| <b>LVEF ≤ 35</b><br>every 6 weeks         | BP control, physical examination, weight,<br>medication: intake / SE?<br>check weight protocol<br>Quality of life? / Behaviour?<br>Labour: K, crea, GPT (ALT)                                                                      |                              |
| every 6 weeks                             | <b>Info Cardiologist:</b> patient, weight, labour,<br>BP / pulse, medication, specialty                                                                                                                                            | ECG, possibly 24h – ECG, UCG |
